# Supplementary material for: A simple PCR-based quick detection of the economically important oriental fruit fly, Bactrocera dorsalis (Hendel) from India
Source: PubMed Central journal article supplement (PMC11263087; doi:10.3389/fpls.2024.1399718), 2024-07-09
Supplement: Image_3.pdf [file Image_3.pdf]

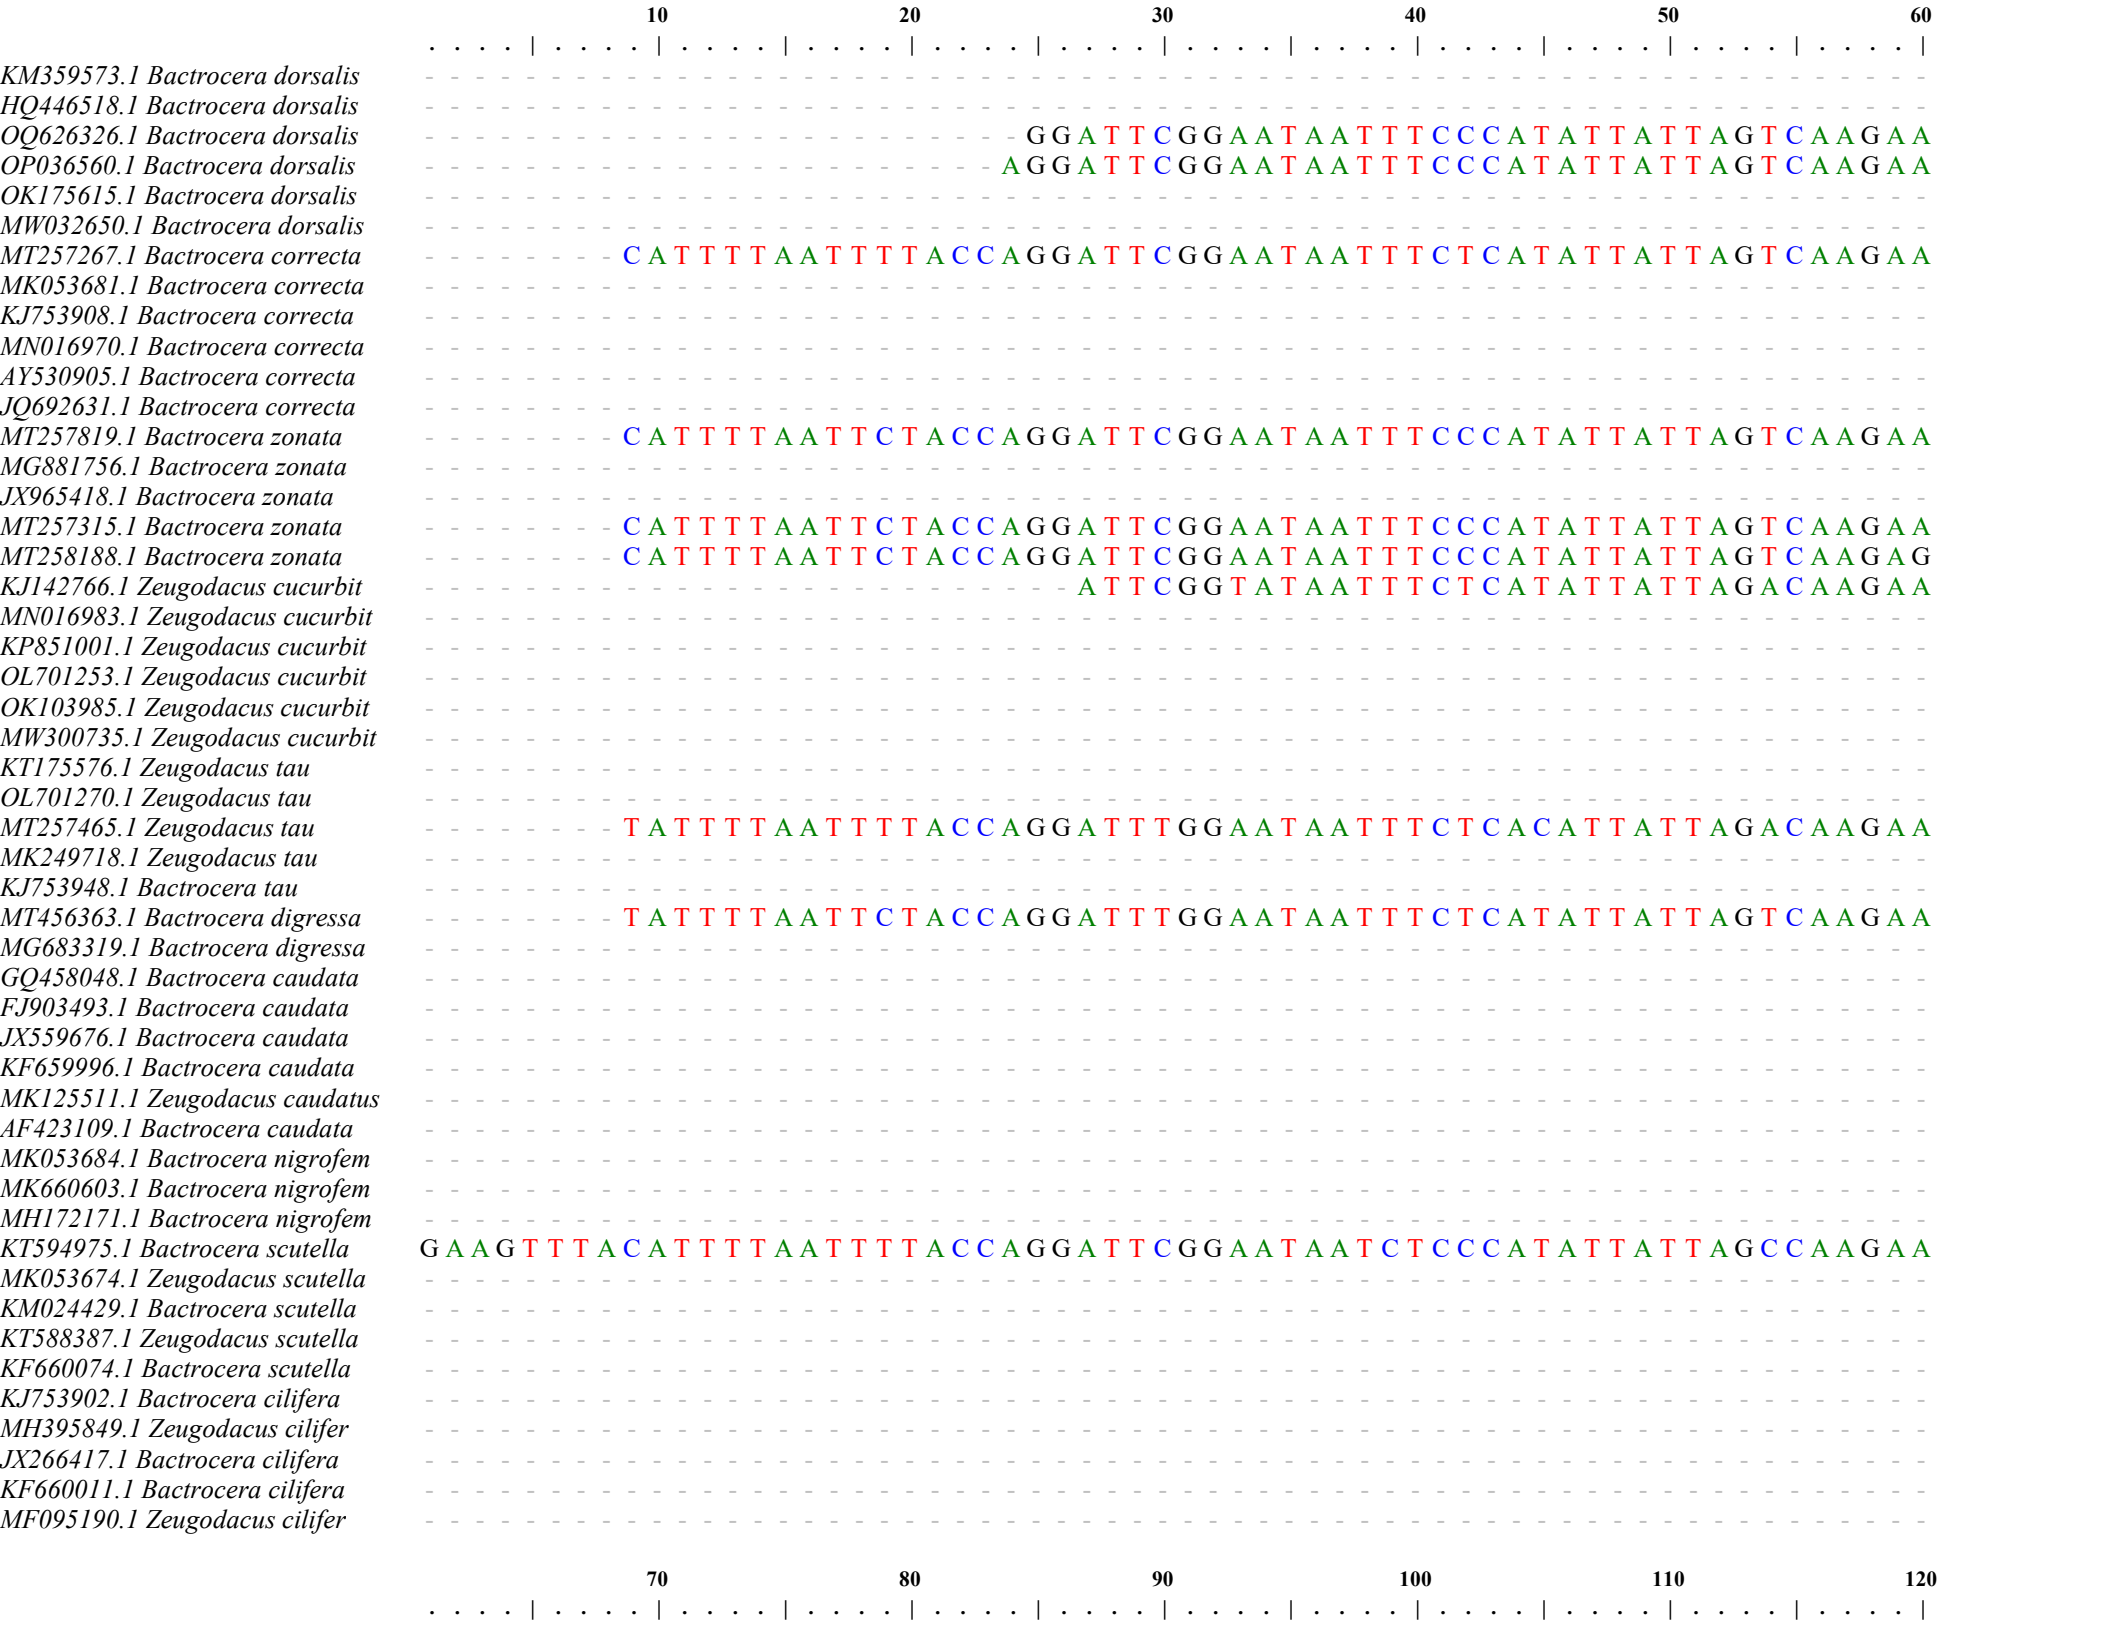

*KM359573.1 Bactrocera dorsalis*  
*HQ446518.1 Bactrocera dorsalis*  
*OQ626326.1 Bactrocera dorsalis*  
*OP036560.1 Bactrocera dorsalis*  
*OK175615.1 Bactrocera dorsalis*  
*MW032650.1 Bactrocera dorsalis*  
*MT257267.1 Bactrocera correcta*  
*MK053681.1 Bactrocera correcta*  
*KJ753908.1 Bactrocera correcta*  
*MN016970.1 Bactrocera correcta*  
*AY530905.1 Bactrocera correcta*  
*JQ692631.1 Bactrocera correcta*  
*MT257819.1 Bactrocera zonata*  
*MG881756.1 Bactrocera zonata*  
*JX965418.1 Bactrocera zonata*  
*MT257315.1 Bactrocera zonata*  
*MT258188.1 Bactrocera zonata*  
*KJ142766.1 Zeugodacus cucurbit*  
*MN016983.1 Zeugodacus cucurbit*  
*KP851001.1 Zeugodacus cucurbit*  
*OL701253.1 Zeugodacus cucurbit*  
*OK103985.1 Zeugodacus cucurbit*  
*MW300735.1 Zeugodacus cucurbit*  
*KT175576.1 Zeugodacus tau*  
*OL701270.1 Zeugodacus tau*  
*MT257465.1 Zeugodacus tau*  
*MK249718.1 Zeugodacus tau*  
*KJ753948.1 Bactrocera tau*  
*MT456363.1 Bactrocera digressa*  
*MG683319.1 Bactrocera digressa*  
*GQ458048.1 Bactrocera caudata*  
*FJ903493.1 Bactrocera caudata*  
*JX559676.1 Bactrocera caudata*  
*KF659996.1 Bactrocera caudata*  
*MK125511.1 Zeugodacus caudatus*  
*AF423109.1 Bactrocera caudata*  
*MK053684.1 Bactrocera nigrofem*  
*MK660603.1 Bactrocera nigrofem*  
*MH172171.1 Bactrocera nigrofem*  
*KT594975.1 Bactrocera scutella*  
*MK053674.1 Zeugodacus scutella*  
*KM024429.1 Bactrocera scutella*  
*KT588387.1 Zeugodacus scutella*  
*KF660074.1 Bactrocera scutella*  
*KJ753902.1 Bactrocera cilifera*  
*MH395849.1 Zeugodacus cilifer*  
*JX266417.1 Bactrocera cilifera*  
*KF660011.1 Bactrocera cilifera*  
*MF095190.1 Zeugodacus cilifer*

T C A G G A A A G A A G G A A A C A T T T G G A T C T C T A G G A A T A A T T T T A T G C T A T A A T A G C A A T T G G T  
T C A G G A A A G A A G G A A A C A T T T G G A T C T C T A G G A A T A A T T T T A T G C T A T A A T A G C A A T T G G T  
- - - - - A T T T A T G C T A T A A T G G C A A T T G G T  
T C A G G A A A G A A G G A A A C A T T C G G A T C T T T A G G A A T A A T T T T A T G C T A T A A T A G C A A T T G G T  
- - - - - T T C T G A A  
- - - - - A A A G A T A T T G G A  
- - - - - A A A G A T A T T G G A  
- - - - - A  
T C A G G A A A G A A G G A A A C A T T T G G A T C T C T A G G A A T A A T C T A C G C T A T A A T A G C A A T T G G T  
- - - - - C A T A A A G A T A T T G G A  
- - - - - A  
T C A G G A A A G A A G G A A A C A T T T G G A T C T C T A G G A A T A A T C T A C G C T A T A A T A G C A A T T G G T  
T C A G G A A A G A A G G A A A C A T T T G G A T C T C T A G G A A T A A T C T A C G C T A T A A T A G C A A T T G G T  
T C A G G T A A A A A G G A A A C A T T T G G T T C C T T A G G T A T A A T T T T A C G C T A T A A T A G C A A T T G G A  
- - - - - C A T A A A G A T A T T G G A  
- - - - - A  
- - - - - C A T A A A G A T A T T G G A  
- - - - -  
- - - - - G A T A T T G G A  
- - - - -  
T C G G G T A A A A A G G A A A C A T T C G G A T C C T T A G G T A T A A T T T T A T G C T A T A A T A G C A A T T G G G  
- - - - - A T C A T A A A G A T A T T G G A  
- - - - - A A A G A T A T T G G A  
T C A G G G A A A A A G G A A A C A T T T G G T T C C C T A G G A A T A A T T T T A T G C T A T A A T A G C A A T T G G T  
- - - - -  
- - - - - T T C C A A T G C A C T A A T C T G C C A T A T T A G A A G T T A G T T A A A A G A G G T A G T T C A G A A  
- - - - -  
- - - - - A  
- - - - - A  
- - - - -  
- - - - - T T C T G A A  
- - - - -  
- - - - -  
T C T G G T A A A A A G A A A C A T T C G G T T C T T T A G G A A T A A T T T T A T G C A A T A A T A G C A A T T G G A  
- - - - - T T C T G A A  
- - - - - A A A G A T A T T G G G A  
- - - - -  
- - - - - A  
- - - - - A A A G A T A T T G G A  
- - - - - G G A  
- - - - - A  
- - - - - A  
- - - - - A  
- - - - - A

130                      140                      150                      160                      170                      180

. . . . | . . . . | . . . . | . . . . | . . . . | . . . . | . . . . | . . . . | . . . . | . . . . | . . . . | . . . . |

*KM359573.1 Bactrocera dorsalis*  
*HQ446518.1 Bactrocera dorsalis*

- - - - - G T T G A T



OK175615.1 *Bactrocera dorsalis* . . . . . C . . . . .  
 MW032650.1 *Bactrocera dorsalis* . . . . . C . . . . .  
 MT257267.1 *Bactrocera correct* . . . . . A . . . T . . . . . T . . . . .  
 MK053681.1 *Bactrocera correct* G G A T A G A T T A C . . . G . C G . . G T . T . C T A . . C T T . C T C A A A T A A . G A A T . G G A A A . A . . . .  
 KJ753908.1 *Bactrocera correct* . T . T T A . . . . . C G T G C C G . A . . . . . G G . C . C C C C G G A G C A C . . A T T G G . . A . G A . C . .  
 MN016970.1 *Bactrocera correct* . T . T T A . . . . . C G T G C C G . A . . . . . G G . C . C C C C G G A G C A C . . A T T G G . . A . G A C C . .  
 AY530905.1 *Bactrocera correct* . . . . . A . . . T . . . . . T . . . . .  
 JQ692631.1 *Bactrocera correct* . T . T T A . . . . . C G T G C C G . A . . . . . G G . C . C C C C G G A G C A C . . A T T G G . . A . G A . C . .  
 MT257819.1 *Bactrocera zonata* . . . . . A . . . T . . . . . C . . . . .  
 MG881756.1 *Bactrocera zonata* . T . T T A . . . . . C G T G C . G . . . . . G G . C . C C C C G G A G C A C . . A T T G G . . A . G A . C . G  
 JX965418.1 *Bactrocera zonata* . T . T T A . . . . . C G T G C . G . A . . . . . G G . C . C C C C G G A G C A C . . A T T G G . . A . G A . C . .  
 MT257315.1 *Bactrocera zonata* . . . . . A . . . T . . . . . C . . . . . T . . . . .  
 MT258188.1 *Bactrocera zonata* . . . . . G . . . T . . . . . C . . . . . T . . . . .  
 KJ142766.1 *Zeugodacus cucurbit* . . . . . A . . . T . . . C . . . . . T . . . T . . T . . T . . A . . . . .  
 MN016983.1 *Zeugodacus cucurbit* . T C T T A . . . . . C C G G G C A G . A . . G . G G T C . C C C . G G A G C T T . . A T . G G . . A . G A . C . .  
 KP851001.1 *Zeugodacus cucurbit* . T C T T A . . . . . C C G G G C A G . A . . G . G G T C . C C C . G G A G C T T . . A T . G G . . A . G A . C . .  
 OL701253.1 *Zeugodacus cucurbit* . T C T T A . . . . . C C G G G C A G . A . . G . G G T C . C C C . G G A G C T T . . A T . G G . . A . G A . C . .  
 OK103985.1 *Zeugodacus cucurbit* . T C T T A . . . . . C C G G G C A G . A . . G . G G T C . C C C . G G A G C T T . . A T . G G . . A . G A . C . .  
 MW300735.1 *Zeugodacus cucurbit* . T C T T A . . . . . C C G G G C A G . A . . G . G G T C . C C C . G G A G C T T . . A T . G G . . A . G A . C . .  
 KT175576.1 *Zeugodacus tau* . T . T T A . . . . . C G . G C A G . A . . . . . G G G C . C C C . G G A G C T T . . A T T G G . . A . G A C C . .  
 OL701270.1 *Zeugodacus tau* . . . . . . . . . . . . . . . . . . . . . G G A G C T T . . A T T G G . . A . G A C C . .  
 MT257465.1 *Zeugodacus tau* . . . . . A . . . T . . C . . . . . T . . . T . . T . . T . . A . . . . .  
 MK249718.1 *Zeugodacus tau* . T . . T A . . . . . C G T G C . G . A T . . . . . G G . C . C C C C G G A G C T T . . A T T G G . . A C G A C C . .  
 KJ753948.1 *Bactrocera tau* . T . T T A . . . . . C G . G C A G . A . . . . . G G G C . C C C . G G A G C T T . . A T T G G . . A . G A C C . .  
 MT456363.1 *Bactrocera digressa* . . . . . C . . . A . . . . . C . . . . . G . . . . . T . . . T . . T . . T . . A . . . . .  
 MG683319.1 *Bactrocera digressa* G A . T T C T T . . . . . G A . G . . G T A A . G G A T G T . T . C G . A A T G . A A A . T T . T G . C . G . A . T . T  
 GQ458048.1 *Bactrocera caudata* G G A T A A A T T A C C . G A C G . . G . . T A . T T A . T C T T . C T C A A A T A A . . A A T . G T A A G . A . . . .  
 FJ903493.1 *Bactrocera caudata* . . . . . A . . . T . . . . . A . . . . . T . . . . . A . . . . .  
 JX559676.1 *Bactrocera caudata* . T C T T A . . . . . C G . G C A G . A T . . . . . G G T C . C C C . G G A G C C C . . A T T G G . . A . G A . C . .  
 KF659996.1 *Bactrocera caudata* . T . . T A . . . . . C G . G C A G . A . . . . . G G T C . C C C . G G A G C C C . . A T T G G . . A . G A . C . .  
 MK125511.1 *Zeugodacus caudatus* . T C T T A . . . . . C G . G C A G . A T . . . . . G G T C . C C C . G G A G C C C . . A T T G G . . A . G A . C . .  
 AF423109.1 *Bactrocera caudata* . . . . . A . . . T . . . . . . . . . . . A . . . . . T . . . . . A . . . . .  
 MK053684.1 *Bactrocera nigrofem* G G G T A G A T T A C . . . G T C G . . G T . T . C T A . G C T T . C T C A A A T G A . G A A T . A G A A A . A . . . .  
 MK660603.1 *Bactrocera nigrofem* . T . T T A . . . . . C G . G C . G . A . . . . . G G T C . T C C T G G A G C A T . . A T T G G . . A . G A . C . .  
 MH172171.1 *Bactrocera nigrofem* . . . . . T C C G C . . . . . C . . . . . T C . C . . T . . . . .  
 KT594975.1 *Bactrocera scutella* . . . . . A . . . A . . . T . . C . . T . . . . . A . . . . . T . . . . . A . . . . .  
 MK053674.1 *Zeugodacus scutella* G G A T A A A T T A C . . . G G C G . . G . . T A . C T A . T C T T . C T C A A A T A A . . A A T . A G A A G . A . . G G  
 KM024429.1 *Bactrocera scutella* . T C T T A . . . . . C G . G C A G . A T . . . . . G G T C . T C C . G G A G C T C . . A T T G G . . A C G A C C . .  
 KT588387.1 *Zeugodacus scutella* . T C T T A . . . . . C G . G C A G . A T . . . . . G G T C . T C C . G G A G C T C . . A T T G G . . A C G A C C . .  
 KF660074.1 *Bactrocera scutella* . T C T T A . . . . . C G . G C A G . A T . . . . . G G T C . T C C . G G A G C T C . . A T T G G . . A C G A C C . .  
 KJ753902.1 *Bactrocera cilifera* . T . T T A A . . . . . C G . G C A G . A T . . . . . G G . C . C C C C G G A G C A T . . A T T G G . . A . G A . C . .  
 MH395849.1 *Zeugodacus cilifer* . T . T T A A . . . . . C G . G C A G . A T . . . . . G G . C . T C C C G G A G C A T . . A T T G G G . . A . G A . C . .  
 JX266417.1 *Bactrocera cilifera* . T . T T A A . . . . . C G . G C A G . A T . . . . . G G . C . C C C C G G A G C A T . . A T T G G . . A . G A . C . .  
 KF660011.1 *Bactrocera cilifera* . T . T T A A . . . . . C G . G C A G . A T . . . . . G G G C . C C C C G G A G C A T . . A T T G G . . A . G A . C . .  
 MF095190.1 *Zeugodacus cilifer* . T . T T A A . . . . . C G . G C A G . A T . . . . . G G . C . C C C C G G A G C A T . . A T T G G . . A . G A . C . .

250 260 270 280 290 DorFP1 300

KM359573.1 *Bactrocera dorsalis* A T T T T T A G T T G A C T G G C T A C A T T A C A C G G T A C A C A A T T A A A C T A T T C A C C A G C - C A T A T -  
 HQ446518.1 *Bactrocera dorsalis* . . . . . A . . . . . T A . A . A A . G . . . . .  
 OQ626326.1 *Bactrocera dorsalis* . . . . . . . . . . . . . . . . . . . . . G . . . . .  
 OP036560.1 *Bactrocera dorsalis* . . . . . . . . . . . . . . . . . . . . . . . . . . .  
 OK175615.1 *Bactrocera dorsalis* . . . . . A . . . . .  
 MW032650.1 *Bactrocera dorsalis* . . . . . A . . . . .





AY530905.1 *Bactrocera correcta* T . . C . . A - . . . . . C . . . . . T - - - . . T  
 JQ692631.1 *Bactrocera correcta* T . A . A . A - . . A T T . C . . C G A A . . A . . . A . . . A A G A . T . . G . . T . T T A C C C C C T T - - - C C C  
 MT257819.1 *Bactrocera zonata* T . . C . . A - . . . . . C . . . . . T - - - . . T  
 MG881756.1 *Bactrocera zonata* C . A C A . A - . . A T T C C . . C G A A . G A . . . A . . . A A G A . T . . G . . T . T T A C C T C C T T - - - C C C  
 JX965418.1 *Bactrocera zonata* C . A C A . A - . . A T T C C . . C G A A . G A . . . A . . . A A G A . T C . G G . T . T T A C C T C C T T - - - C C C  
 MT257315.1 *Bactrocera zonata* T . . A . . A - . . . . . C . . . . . T - - - . . T  
 MT258188.1 *Bactrocera zonata* T . . C . . A - . . . . . C . . . . . T - - - . . T  
 KJ142766.1 *Zeugodacus cucurbit* . . . A T . A - . . C . . C . . T . . . . . T . . . . . C . . . . .  
 MN016981.1 *Zeugodacus cucurbit* . . A . A . A - . . A T T C C . T C G A A . G A . . . A . . . A A G A . T . . G . . T . T T A C C T C C C T - - - C . C  
 KP851003.1 *Zeugodacus cucurbit* . . A . A . A - . . A T T C C . T C G A A . G A . . . A . . . A A G A . T . . G . . T . T T A C C T C C C T - - - C . C  
 OL701253.1 *Zeugodacus cucurbit* . . A . A . A - . . A T T C C . T C G A A . G A . . . A . . . A A G A . T . . G . . T . T T A C C T C C C T - - - C . C  
 OK103985.1 *Zeugodacus cucurbit* . . A . A . A - . . A T T C C . T C G A A . G A . . . A . . . A A G A . T . . G . . T . T T A C C T C C C T - - - C . C  
 MW300735.1 *Zeugodacus cucurbit* . . A . A . A - . . A T T C C . T C G A A . G A . . . A . . . A A G A . T . . G . . T . T T A C C T C C C T - - - C . C  
 KT175576.1 *Zeugodacus tau* . . A . A . A - . . G T T C C . T C G A A . G A . . . A . . . A A G A . T . . G . . T . T T A C C T C C C T - - - C . C  
 OL701270.1 *Zeugodacus tau* . . A . A . A - . . G T T C C . T C G A A . G A . . . A . . . A A G A . T . . G . . T . T T A C C T C C C T - - - C . C  
 MT257465.1 *Zeugodacus tau* . . . A T . A - . . A . . C . . T . . . . . T . . . . . T . . . . .  
 MK249718.1 *Zeugodacus tau* . . A . A . A - . . A T T C C . C C G A A . . A . . . A . . . A A G T . T . . G . . T . . T A C C T C C . T - - - C . C  
 KJ753948.1 *Bactrocera tau* . . A . A . A - . . G T T C C . T C G A A . G A . . . A . . . A A G A . T . . G . . T . T T A C C T C C C T - - - C . C  
 MT456363.1 *Bactrocera digressa* T . . C . . - . . . . . C . . . . . C . . . . . T . . . . . T - - - . .  
 MG683319.1 *Bactrocera digressa* T C A C G . A T . T . G G A C . G C A A A G G C . . . . . G C A A - - - . C G . G . T G G . A . G . G . T G A C G A A C  
 GQ458048.1 *Bactrocera caudata* G A A G G . G - A T A T T . A . T C . A A . . A . . . A . . A A T A A A . . G . C T T T T T . A T C A T T T A G . A T  
 FJ903493.1 *Bactrocera caudata* . . . A . . A - . . . . . T . . . . . C . . . . . T . . . . . T . . . . . C  
 JX559676.1 *Bactrocera caudata* . . A . A . A - . . A T T . C . . C G A A . . A . . . A . . . A A G A . T C . G . . T . . T G C C T C C T T - - - C A C  
 KF659996.1 *Bactrocera caudata* . . A C A . A - . . A T T . C . . C G A A . . A . . . A C . . A A G A . T C . G . . T . . T G C C C C C T T - - - C A C  
 MK125511.1 *Zeugodacus caudatus* . . A . A . A - . . A T T . C . . C G A A . . A . . . A . . . A A G A . T C . G . . T . . T G C C T C C T T - - - C A C  
 AF423109.1 *Bactrocera caudata* . . . A . . A - . . . . . T . . . . . C . . . . . T . . . . . T . . . . . C  
 MK053684.1 *Bactrocera nigrofem* G A A . G . . - A A A T T . A . C C . A A . . A . . . A . . A A T A A A . . G . C T T T T T . A T C A T T T A G . A T  
 MK660603.1 *Bactrocera nigrofem* T . A C A . A - . . . T T C C . . C G A A . . A . . . A . . . A A G A . T . . G G . T . . T A C C T C C T T - - - C C C  
 MH172171.1 *Bactrocera nigrofem* T . . C . . A - . . . . . C . . . . . T . . . . . T - - - . .  
 KT594975.1 *Bactrocera scutella* . . . A T . A - . . . . . T . . . . . C . . . . . T . . . . .  
 MK053674.1 *Zeugodacus scutella* G A A . G . . - A G A T T . A . . C . A A . . A . . . A . . A A T A A A . . G . C T T T T T . A T C A T T T A G . A T  
 KM024429.1 *Bactrocera scutella* . . A . A . A - . . C T T C C . . C G A A . . A . . . A . . . A A G A . T C . G . . T . . T G C C T C C T T - - - C A C  
 KT588387.1 *Zeugodacus scutella* . . A . A . A - . . C T T C C . . C G A A . . A . . . A . . . A A G A . T C . G . . T . . T G C C T C C T T - - - C A C  
 KF660074.1 *Bactrocera scutella* . . A . A . A - . . C T T C C . . C G A A . . A . . . A . . . A A G A . T C . G . . T . . T G C C T C C T T - - - C A C  
 KJ753902.1 *Bactrocera cilifera* . . A . A . A - . . A T T . C . T C G A A . . A . . . A . . . A A G A . T . . G . . T . T T G C C C C C T - - - C . C  
 MH395849.1 *Zeugodacus cilifer* . . A . A . A - . . A T T . C . T C G A A . . A . . . A . . . A A G A . T . . G . . T . T T G C C T C C C T - - - C . C  
 JX266417.1 *Bactrocera cilifera* . . A . A . A - . . A T T . C . T C G A A . . A . . . A . . . A A G A . T . . G . . T . T T G C C C C C T - - - C . C  
 KF660011.1 *Bactrocera cilifera* . . A . A . A - . . A T T . C . T C G A A . . A . . . A . . . A A G A . T . . G . . T . T T G C C T C C C T - - - C . C  
 MF095190.1 *Zeugodacus cilifer* . . A . A . A - . . A T T . C . T C G A A . . A . . . A . . . A A G A . T . . G . . T . T T G C C T C C C T - - - C . C

. . . . . 430 . . . . . 440 . . . . . 450 . . . . . 460 . . . . . 470 . . . . . 480  
 KM359573.1 *Bactrocera dorsalis* G T A G C T C A T T T C C A C T A T G T A T T A T C - A A T A G G A G C A G T C T T - T G C T A T T A T A G C A G G A T  
 HQ446518.1 *Bactrocera dorsalis* . . . . .  
 OQ626326.1 *Bactrocera dorsalis* . . . . .  
 OP036560.1 *Bactrocera dorsalis* . . . . .  
 OK175615.1 *Bactrocera dorsalis* . . . . .  
 MW032650.1 *Bactrocera dorsalis* . . . . .  
 MT257267.1 *Bactrocera correcta* . . T . . . . . C . . . . . A . . . . . C . . . . .  
 MK053681.1 *Bactrocera correcta* T . . . T A . T A A . . . T G . . A A . . G A G G G T . T C . . T G A A C . A A . C C . . . . . A . . G . . A A T A  
 KJ753908.1 *Bactrocera correcta* T . . C A . T . C . A T T . G . . A . A . G . . . . . G . . . A . A A T . G A - - - . . G G . . C . . G T T . . A  
 MN016970.1 *Bactrocera correcta* T . . C A . T . C . A T T . G . . A . A . G . . . . . G . . . A . A A T . G A - - - . . G G . . C . . G T T . . A  
 AY530905.1 *Bactrocera correcta* . . T . . . . . C . . . . . A . . . . . C . . . . .  
 JQ692631.1 *Bactrocera correcta* T . . C A . T . C . A T T . G . . A . A . G . . . . . G . . . A . A A T . G A - - - . . G G . . C . . G T T . . A

MT257819.1 *Bactrocera zonata* . . . . . T . . . . . C . . . . . A . . . - C . . C . . . . .  
 MG881756.1 *Bactrocera zonata* T . . C G C T G C . A T T . G . G A . A . G . . . . . G . . . A . A A C . G A - - - . . . G G . . C . . G T T . . A  
 JX965418.1 *Bactrocera zonata* T . . C A C T . C . A T T . G . G A . A . G . . . . . G . . . A . A A T . G A - - - . . . G G . . C . . G T T . . A  
 MT257315.1 *Bactrocera zonata* . . . . . T . . . . . C . . . . . A . . . - C . . C . . . . . G . . C . . . . .  
 MT258188.1 *Bactrocera zonata* . . . . . T . . . . . C . . . . . A . . . - C . . C . . . . .  
 KJ142766.1 *Zeugodacus cucurbit* . . . . . T . . . . . T . . . . . A . . . . . T . . . . .  
 MN016983.1 *Zeugodacus cucurbit* T . . C A . T . C . . T T . G . G A . C . G . . . . . G . . . A . A A C . G A - - - . . . G G . . C . . G T T . . A  
 KP851001.1 *Zeugodacus cucurbit* T . . C A . T . C . . T T . G . G A . C . G . . . . . G . . . A . A A C . G A - - - . . . G G . . C . . G T T . . A  
 OL701253.1 *Zeugodacus cucurbit* T . . C A . T . C . . T T . G . G A . C . G . . . . . G . . . A . A A C . G A - - - . . . G G . . C . . G T T . . A  
 OK103985.1 *Zeugodacus cucurbit* T . . C A . T . C . . T T . G . G A . C . G . . . . . G . . . A . A A C . G A - - - . . . G G . . C . . G T T . . A  
 MW300735.1 *Zeugodacus cucurbit* T . . C A . T . C . . T T . G . G A . C . G . . . . . G . . . A . A A C . G A - - - . . . G G . . C . . G T T . . A  
 KT175576.1 *Zeugodacus tau* T . . C A . T . C . . T T . G . G A . C . G . . . . . G . . . A . A A C . G A - - - . . . G G . . C . . G T T . . A  
 OL701270.1 *Zeugodacus tau* T . . C A . T . C . . T T . G . G A . C . G . . . . . G . . . A . A A C . G A - - - . . . G G . . C . . G T T . . A  
 MT257465.1 *Zeugodacus tau* . . . . . T . . . . . T . . . . . A . . . . . C . . . . .  
 MK249718.1 *Zeugodacus tau* T . . C . . T . C . . T T . G . C A . C . G . . . . . G . G . A . A A C . G A - - - . . C G G A . C . . G T T . . A  
 KJ753948.1 *Bactrocera tau* T . . C A . T . C . . T T . G . G A . C . G . . . . . G . . . A . A A C . G A - - - . . . G G . . C . . G T T . . A  
 MT456363.1 *Bactrocera digressa* . . T . . . . . T . . . . . G . . . . . A . . . - C . . . . .  
 MG683319.1 *Bactrocera digressa* C . . A A G - . G C G . . . T . G A . . T . . G C G A . G A . . T T . G C T A T C C A . . T C T C G T G C . A C C . T C  
 GQ458048.1 *Bactrocera caudata* T . . . A A . . A G . . . T G . G A A . . A . G G A T . T C . . T G A A C A A A . C C . . . . . A . . . . . A A T A  
 FJ903493.1 *Bactrocera caudata* . . . . . C . . C . . . . . C . . C . . . . . T . . . . . A . . . . .  
 JX559676.1 *Bactrocera caudata* T . . C A C T . C . . T T . G . G A . C . G . . . . . G . . . A . A A T . G A - - - . . C G G A . C . . G T T . . A  
 KF659996.1 *Bactrocera caudata* T . . C A C T . C . . T T . G . G A . C . G . . . . . G . . . A . A A T . G A - - - . . C G G A . C . . G T T . . A  
 MK125511.1 *Zeugodacus caudatus* T . . C A C T . C . . T T . G . G A . C . G . . . . . G . . . A . A A T . G A - - - . . C G G A . C . . G T T . . A  
 AF423109.1 *Bactrocera caudata* . . . . . C . . C . . . . . C . . C . . . . . T . . . . . A . . . . .  
 MK053684.1 *Bactrocera nigrofem* T . . . T A . T A G . . . T G . . A A . . G G G G G T . T C . . T G . A C . A A . C C . . . . . A . . . G . . G A A T A  
 MK660603.1 *Bactrocera nigrofem* T . . C . C T T C . G T T . G . G A . A . G . . . . . G . G . A . A A C . G A - - - . . . G G . . C . . G . T . . A  
 MH172171.1 *Bactrocera nigrofem* . . . . . C . . . . . C . . . . . A . . . . . G . . . . .  
 KT594975.1 *Bactrocera scutella* . . . . . C . . C . . T . . . . . T . . . . . A . . . - C . . . . .  
 MK053674.1 *Zeugodacus scutella* T . . A T A . . A G . . . T G . . A A . . A . G G G T . T C . . T G . A C . A A . C C . . . . . A . . . . . G A A T A  
 KM024429.1 *Bactrocera scutella* T . . C A C T . C . . T T . G . G A . C . G . . . . . G . G . A . A A C . G A - - - . . . G G G . C . . G T T . . A  
 KT588387.1 *Zeugodacus scutella* T . . C A C T . C . . T T . G . G A . C . G . . . . . G . G . A . A A C . G A - - - . . . G G G . C . . G T T . . A  
 KF660074.1 *Bactrocera scutella* T . . C A C T . C . . T T . G . G A . C . G . . . . . G . G . A . A A C . G A - - - . . . G G G . C . . G T T . . A  
 KJ753902.1 *Bactrocera cilifera* T . . C A . T . C . . T T . G . . A . C . G . . . . . G . . . A . A A T . G A - - - . . . G G . . C . . G . T . . A  
 MH395849.1 *Zeugodacus cilifer* T . . C A . T . C . . T T . G . . A . C . G . . . . . G . G . A . A A C . G A - - - . . . G G . . C . . G . T . . A  
 JX266417.1 *Bactrocera cilifera* T . . C A . T . C . . T T . G . . A . C . G . . . . . G . . . A . A A T . G A - - - . . . G G . . C . . G . T . . A  
 KF660011.1 *Bactrocera cilifera* T . . C A . T . C . . T T . G . . A . C . G . . . . . G . . . A . A A T . G A - - - . . . G G . . C . . G . T . . A  
 MF095190.1 *Zeugodacus cilifer* T . . C A . T G C . . T T . G . . A . C . G . . . . . G . . . A . A A T . G A - - - . . . G G . . C . . G . T . . A

490                      500                      510                      520                      530                      540

KM359573.1 *Bactrocera dorsalis* T C G T T - - C A C T G A T A T C C C C T A T T T A - C A G G G C T A G T A T T A A A T C C T A A A T G A T T A A A A A  
 HQ446518.1 *Bactrocera dorsalis* . . . . . C . . . . .  
 OQ626326.1 *Bactrocera dorsalis* . . . . . C . . . . . T . . . . .  
 OP036560.1 *Bactrocera dorsalis* . . . . . C . . . . . T . . . . .  
 OK175615.1 *Bactrocera dorsalis* . . . . . C . . . . .  
 MW032650.1 *Bactrocera dorsalis* . . . . .  
 MT257267.1 *Bactrocera correcta* . . . . . C . . T . . . . . A T . . . . . C . . . . . C . . . . . G . . . . .  
 MK053681.1 *Bactrocera correcta* C T . C . C C T . T . . . . . A T A . G . . G . G G A A . T . A G C . A C . A C . T . A T A . G T G . C . . G . . G - .  
 KJ753908.1 *Bactrocera correcta* C A . . . - - T . . C C T C C C . T A T C . . C . G T T . T T . . . C A C G G A G G . G . T . C G G . - - . G . T C T .  
 MN016970.1 *Bactrocera correcta* C A . . . - - T . . C C T C C C . T A T C . . C . G T T . T T . . . C A C G G A G G . G . T . C G G . - - . G . T C T .  
 AY530905.1 *Bactrocera correcta* . . . . . C . . T . . . . . A T . . . . . C . . . . . C . . . . . G . . . . .  
 JQ692631.1 *Bactrocera correcta* C A . . . - - T . . C C T C C C . T A T C . . C . G T T . T T . . . C A C G G A G G T G . T . C G G . - - . G . T C T .  
 MT257819.1 *Bactrocera zonata* . . . . . C - - . . . . . C . . . . . A . . . . . C . . . . .  
 MG881756.1 *Bactrocera zonata* C A . . . - - T . T C C T C C C . T A T C . . C . G T T . T T . . . C A C G G A G G G G . T . C . G . - - . G . T C T .





MT258188.1 *Bactrocera zonata* . . . . . T . . . . . A  
 KJ142766.1 *Zeugodacus cucurbit* . . . . . G . . . . . T . T . . . . . C . . . . . T . . . . . T . . . . . C  
 MN016983.1 *Zeugodacus cucurbit* . CT . T . . . T . CTC . C . . . . . G . T . . . . . T - - T . CATCAA . T . AGGGG . CGT . AA . .  
 KP851001.1 *Zeugodacus cucurbit* . CT . T . . . T . CTC . C . . . . . G . T . . . . . T - - T . CATCAA . T . AGGGG . CGT . AA . .  
 OL701253.1 *Zeugodacus cucurbit* . CT . T . . . T . CTC . C . . . . . G . T . . . . . T - - T . CATCAA . T . AGGGG . CGT . AA . .  
 OK103985.1 *Zeugodacus cucurbit* . CT . T . . . T . CTC . C . . . . . G . T . . . . . T - - T . CATCAA . T . AGGGG . CGT . AA . .  
 MW300735.1 *Zeugodacus cucurbit* . CT . T . . . T . CTC . C . . . . . G . T . . . . . T - - T . CATCAA . T . AGGGG . CGT . AA . .  
 KT175576.1 *Zeugodacus tau* . CT . T . . . T . CTC . C . . . . . G . T . . . . . T - - T . CATCAA . T . AGGGG . TGT . AA . .  
 OL701270.1 *Zeugodacus tau* . CT . T . . . T . CTC . C . . . . . G . T . . . . . T - - T . CATCAA . T . AGGGG . TGT . AA . .  
 MT257465.1 *Zeugodacus tau* . C . . . . . T . T . . . . . C . . . . . T . . . . . T . . . . . C  
 MK249718.1 *Zeugodacus tau* . C . . TC . T . CC . C . . . . . G . A . . . . . T - - T . C . TCAA . T . AGGGG . TGT . AA . .  
 KJ753948.1 *Bactrocera tau* . CT . T . . . T . CTC . C . . . . . G . T . . . . . T - - T . CATCAA . T . AGGGG . TGT . AA . .  
 MT456363.1 *Bactrocera digressa* . . . . . T . . . . . A . . . . . T . . . . . T . . . . .  
 MG683319.1 *Bactrocera digressa* CCT . C . . A . A . GC . GC . G - . C . CTC . TAA . . . . GG . GCATC . AG . AG . TAT . TCTA . A . . C  
 GQ458048.1 *Bactrocera caudata* A . A . TG . CTAC . GA . G . A . . . G . TAGTAC . . C - - TCC . GTTAA . . C . . . T . . TGTGAA . A  
 FJ903493.1 *Bactrocera caudata* . . . . . T . . . . . A . C . . . . . T . . . . . C  
 JX559676.1 *Bactrocera caudata* . CT . T . . . T . CT . . . C . C . . . G . T . . . . . A . T - - T . CCTCTA . T . AGGAG . CGT . AA . .  
 KF659996.1 *Bactrocera caudata* . CT . T . . . C . CT . . . C . . . . . G . T . . . . . A . T - - T . CCTCTA . T . AGG . G . CGT . AA . .  
 MK125511.1 *Zeugodacus caudatus* . CT . T . . . T . CT . . . C . . . . . G . T . . . . . A . T - - T . CCTCTA . T . AGGAG . CGT . AA . .  
 AF423109.1 *Bactrocera caudata* . . . . . T . . . . . A . C . . . . . T . . . . . C  
 MK053684.1 *Bactrocera nigrofem* A . A . TA . CTAC . GATG . A . . . G . TAGGACA . C - - TCC . GTTAA . . C . . . T . . TGT . AA . A  
 MK660603.1 *Bactrocera nigrofem* . C . . T . . . C . C . C . TC . CC . . . G . T . . . . . T - - T . C . TCAA . . T . AGGGG . GGTTAA . .  
 MH172171.1 *Bactrocera nigrofem* . . . . . C . . . . . T . . . . . A . . . . . T . . . . . C  
 KT594975.1 *Bactrocera scutella* . . . . . T . T . . . . . C . . . . . A . . . . . T . . . . . T . . . . . C  
 MK053674.1 *Zeugodacus scutella* A . A . TA . CTAC . GA . G . A . . . G . TA . TAC . . C - - TCCC GTTAAA . C . . . T . . TGTGAA . A  
 KM024429.1 *Bactrocera scutella* . CT . TC . . . C . CT . . . C . C . . . G . T . . . . . A . T - - T . CATCTA . T . AGGTG . TGT . AA . .  
 KT588387.1 *Zeugodacus scutella* . CT . TC . . . C . CT . . . C . C . . . G . T . . . . . A . T - - T . CATCTA . T . AGGTG . TGT . AA . .  
 KF660074.1 *Bactrocera scutella* . CT . TC . . . C . CT . . . C . C . . . G . T . . . . . A . T - - T . CATCTA . T . AGGTG . TGT . AA . .  
 KJ753902.1 *Bactrocera cilifera* . CA . T . . . T . CT . . . C . C . . . G . A . . . . . A . T - - C . CATCTA . T . AGGGG . TGT . AA . .  
 MH395849.1 *Zeugodacus cilifer* . CA . T . . . T . CT . . . C . C . . . G . A . . . . . A . T - - C . CATCTA . T . AGGGG . TGT . AA . .  
 JX266417.1 *Bactrocera cilifera* . CA . T . . . T . CT . . . C . C . . . G . A . . . . . A . T - - C . CATCTA . T . AGGGG . TGT . AA . .  
 KF660011.1 *Bactrocera cilifera* . CA . T . . . T . CT . . . C . C . . . G . A . . . . . A . T - - C . CATCTA . T . AGGGG . TGT . AA . .  
 MF095190.1 *Zeugodacus cilifer* . CA . T . . . T . CT . . . C . C . . . G . A . . . . . A . T - - C . CATCTA . T . AGGGG . TGT . AA . .

610                      620                      630                      640                      650                      660

KM359573.1 *Bactrocera dorsalis* TTAGGATTAGCTGGTATACCTCGACGATATTTCCAGACTATCCAGATGCTTACACAACATGA  
 HQ446518.1 *Bactrocera dorsalis* . . . . . T . . . . .  
 OQ626326.1 *Bactrocera dorsalis* . . . . . T . . . . .  
 OP036560.1 *Bactrocera dorsalis* . . . . . T . . . . .  
 OK175615.1 *Bactrocera dorsalis* . . . . .  
 MW032650.1 *Bactrocera dorsalis* . . . . .  
 MT257267.1 *Bactrocera correcta* . . . . . A . A . . . . . C . G . T . . . . . C . G . C . A . . . . . T . . . . .  
 MK053681.1 *Bactrocera correcta* GG . AC . CA . A . CCTAGGG . . CAT . AT . . . GCTG . GGAG . A - . TT . AA . GTGT . C . G . . T  
 KJ753908.1 *Bactrocera correcta* . . . TC . CA . - . C . T . . . TAACATG . . . CGA . . . GAAT . T . . TT . ACCGA . T . C . TCT .  
 MN016970.1 *Bactrocera correcta* . . . TC . CA . - . C . T . . . TAACAT . . . CGA . . . GAAT . T . . TT . ACCGA . T . C . TCT .  
 AY530905.1 *Bactrocera correcta* . . . . . A . A . . . . . C . G . T . . . . . C . G . C . A . . . . . T . . . . .  
 JQ692631.1 *Bactrocera correcta* . . . TC . CA . - . C . T . . . TAACAT . . . CGA . . . GAAT . T . . TT . ACCGA . T . C . TCT .  
 MT257819.1 *Bactrocera zonata* . . . . . A . A . . . . . T . . . . . T . C . T . C . A . T . . . . .  
 MG881756.1 *Bactrocera zonata* . . . TT . CA . - . . . T . . . TAA . AT . . . T . CAA . . . GAAT . T . . TT . A . CGA . T . C . TCTC  
 JX965418.1 *Bactrocera zonata* . C . TC . CA . - . C . T . . . TAACAT . . . . CAA . . . GAAT . T . . TT . ACCGA . T . C . TCTC  
 MT257315.1 *Bactrocera zonata* . . . . . A . A . . . . . C . . . . . T . . . . . T . C . T . C . A . T . . . . .  
 MT258188.1 *Bactrocera zonata* . . . . . A . A . . . . . T . . . . . T . C . T . C . A . T . . . . .  
 KJ142766.1 *Zeugodacus cucurbit* . . . . . A . A . . . . . T . . . . . C . C . . . . . C . . . . . G . . . . .

MN016983.1 *Zeugodacus cucurbit* . C . TT . C . . - . A . TA . . TAA . ATG . . . . CAA . . . GAATCA . . TT . . ACCGG . T . C . T . T .  
KP851001.1 *Zeugodacus cucurbit* . C . TT . C . . - . A . TA . . TAA . ATG . . . . CAA . . . GAATCA . . TT . . ACCGG . T . C . T . T .  
OL701253.1 *Zeugodacus cucurbit* . C . TT . C . . - . A . TA . . TAA . ATG . . . . CAA . . . GAATCA . . TT . . ACCGG . T . C . T . T .  
OK103985.1 *Zeugodacus cucurbit* . C . TT . C . . - . A . TA . . TAA . ATG . . . . CAA . . . GAAT . A . . TT . . ACCGG . T . C . T . T .  
MW300735.1 *Zeugodacus cucurbit* . C . TT . C . . - . A . TA . . TAA . ATG . . . . CAA . . . GAATCA . . TT . . ACCGG . T . C . T . T .  
KT175576.1 *Zeugodacus tau* . C . TT . C . . - . A . TA . . TAA . AT . . . . CAA . . . GGAT . A . . TT . . ACCGA . T . C . T . T .  
OL701270.1 *Zeugodacus tau* . C . TT . C . . - . A . TA . . TAA . AT . . . . CAA . . . GGAT . A . . TT . . ACCGA . T . C . T . T .  
MT257465.1 *Zeugodacus tau* . . . . . . . . . . . . . . . . . . . . . . . . . . . . . . . . . T . . . . . C . . . . . . . . . . . . . . . . . . . . . . . .  
MK249718.1 *Zeugodacus tau* . . . TT . CA . - . A . T . . . TAA . AT . . . . C . A . . . GAAT . AGC . TT . . ACCGA . T . C . T . C . T . G  
KJ753948.1 *Bactrocera tau* . C . TT . C . . - . A . TA . . TAA . AT . . . . CAA . . . GGAT . A . . TT . . ACCGA . T . C . T . T .  
MT45663.1 *Bactrocera digressa* . . . G . . . . . . . . . . . . . . . . . . . . . . . . . . . . . . . . . T . . . . . C . . . . . . . . . . . . . . . . . . . . . . . .  
MG683319.1 *Bactrocera digressa* . . . GAC . GA . . . AAAAGAGATCGATGTTGG . CG . C . TGGCGG . G . . . . G . G . G . TTTTG . . C  
GQ458048.1 *Bactrocera caudata* GG . AT . CA . ATCC . TA . GG . TCAT . AT . . . GCTG . . GAG . A - . TT . AG . . GTGT . C . . . . .  
FJ903493.1 *Bactrocera caudata* . . . . . . . . . . A . . . . . . . . . . . . . . . . . . . . . . . . . . . T . . . . . C . . . . . C . . . . . . . . . . T . . . . . . . . . . . . . . . . . . . . . . . .  
JX559676.1 *Bactrocera caudata* . . . TT . C . . - . A . TA . . TAA . CAT . . . . C . A . . . GAAT . A . . TTC . ACCGA . T . C . . . T .  
KF659996.1 *Bactrocera caudata* . . . TT . C . . - . A . TA . . TAA . AT . . . . CCA . . . GAAT . A . . TTC . ACCGA . T . C . G . T .  
MK125511.1 *Zeugodacus caudatus* . . . TT . C . . - . A . TA . . TAA . CAT . . . . C . A . . . GAAT . A . . TTC . ACCGA . T . C . . . T .  
AF423109.1 *Bactrocera caudata* . . . . . . . . . . A . . . . . . . . . . . . . . . . . . . . . . . . . . . T . . . . . C . . . . . C . . . . . . . . . . T . . . . . . . . . . . . . . . . . . . . . . . .  
MK053684.1 *Bactrocera nigrofem* AG . AT . CA . ATCC . TAGGG . . CAC . GT . . . GCTG . . GAG . A - GTT . AG . . GTGT . C . . . . T  
MK660603.1 *Bactrocera nigrofem* . . . TT . CA . - . C . TA . . TAA . AT . . . . C . A . . . GAAT . T . . TT . . ACCGA . T . C . T . C . T .  
MH172171.1 *Bactrocera nigrofem* . . . . . . . . . . A . . A . . . . . G . . . . . T . . . . . . . . . . . . . . . . . . . . . A . . . . . T . . . . . . . . . . . . . . . . . . . . . . . .  
KT594975.1 *Bactrocera scutella* . . . . . . . . . . . . . . . . . . . . . . . . . . . . . . . . . T . . . . . T . . . . . . . . . . T . . . . . C . . . . . . . . . . T . . . . . . . . . . . . . . . . . . . . . . . .  
MK053674.1 *Zeugodacus scutella* AG . AT . CA . ATCC . TAGGG . . TCAT . AT . . . GCTG . . GA . . A - TT . AG . . GTGTTC . . . . .  
KM024429.1 *Bactrocera scutella* . C . TT . CA . - . A . TA . . TAA . AT . . . . C . A . . . GAAT . A . . TTC . ACCGA . T . C . T . T .  
KT588387.1 *Zeugodacus scutella* . C . TT . CA . - . A . TA . . TAA . AT . . . . C . A . . . GAAT . A . . TTC . ACCGA . T . C . T . T .  
KF660074.1 *Bactrocera scutella* . C . TT . CA . - . A . TA . . TAA . AT . . . . C . A . . . GAAT . A . . TTC . ACCGA . T . C . T . T .  
KJ753902.1 *Bactrocera cilifera* . . . TC . C . . - . A . TC . . TAA . ATG . . . . CAA . G . GAAT . A . . TTC . A . CGA . T . C . T . T .  
MH395849.1 *Zeugodacus cilifer* . . . TC . C . . - . A . TC . . TAA . AT . . . . CAA . . . GAAT . A . . TTC . A . CGA . T . C . T . T .  
JX266417.1 *Bactrocera cilifera* . . . TC . C . . - . A . TC . . TAA . AT . . . . CAA . G . GAAT . A . . TTC . A . CGA . T . C . T . T .  
KF660011.1 *Bactrocera cilifera* . . . TC . C . . - . A . TC . . TAA . AT . . . . CAA . G . GAAT . A . . TTC . A . CGA . T . C . T . T .  
MF095190.1 *Zeugodacus cilifer* . . . TC . C . . - . A . TC . . TAA . ATG . . . . CAA . . . GAAT . A . . TTC . A . CGA . T . C . T . T .

670 680 690 700 710 720

... | ... | ... | ... | ... | ... | ... | ... | ... | ... | ... | ... | ... | ... | ... | ... |

KM359573.1 *Bactrocera dorsalis* AATGTAAGTTTCTACTATTGGTTCGTCTATTTCTTTAC - TAGGAATTTTATTCTTCCTAAT  
HQ446518.1 *Bactrocera dorsalis* . . . . . . . . . . . . . . . . . . . . . . . . . . . . . . . . . A . . . . . . . . . . . . . . . . . . . . . . . .  
OQ626326.1 *Bactrocera dorsalis* . . . . . . . . . . . . . . . . . . . . . . . . . . . . . . . . . A . . . . . . . . . . . . . . . . . . . . . . . .  
OP036560.1 *Bactrocera dorsalis* . . . C . . . . . . . . . . . . . . . . . . . . . . . . . . . . . . . . . A . . . . . . . . . . . . . . . . . . . . . . . .  
OK175615.1 *Bactrocera dorsalis* . . . . . . . . . . . . . . . . . . . . . . . . . . . . . . . . . A . . . . . . . . . . . . . . . . . . . . . . . .  
MW032650.1 *Bactrocera dorsalis* . . . . . . . . . . . . . . . . . . . . . . . . . . . . . . . . . A . . . . . . . . . . . . . . . . . . . . . . . .  
MT257267.1 *Bactrocera correcta* . . . . . . . . . . . . . . . . . . . . . . . . . . . . . . . . . A . . . . . . . . . . . . . . . . . . . . . . . .  
MK053681.1 *Bactrocera correcta* . . . . . - A . G . GGCTAG . CAAC . AAAAAT . . . AA . AC . - . GT . GG . ACAGCAA . AAT . . . .  
KJ753908.1 *Bactrocera correcta* T - - - . C . . . . . GAG . AG . . . TA . TAA . AGC . . TA . . . . . - T - - - - - C . G . . A . CA . . . . CC  
MN016970.1 *Bactrocera correcta* T - - - . C . . . . . GAG . AG . . . TA . TAA . AGC . . TA . . . . . - T - - - - - C . . . . . A . CA . . . . CC  
AY530905.1 *Bactrocera correcta* . . . . . . . . . . . . . . . . . . . . . . . . . . . . . . . . . A . . . . . . . . . . . . . . . . . . . . . . . .  
JQ692631.1 *Bactrocera correcta* T - - - . C . . . . . GAG . AG . . . TA . TAA . AGC . . TA . . . G . . - T - - - - - C . . . . . A . CA . . . . CC  
MT257819.1 *Bactrocera zonata* . . . . . . . . . . . . . . . . . . . . . . . . . . . . . . . . . A . . . . . . . . . . . . . . . . . . . . . . . .  
MG881756.1 *Bactrocera zonata* T - - - . C . . . . . GAG . AG . . . TA . TAA . AGCCCTA . . . . . - T - - - - - C . G . . A . CAT . GCC  
JX965418.1 *Bactrocera zonata* T - - - . C . . . . . GAG . AG . . . TA . TAA . AGCCCTA . . . . . - T - - - - - C . G . . A . CAT . . CC  
MT257315.1 *Bactrocera zonata* . . . . . . . . . . . . . . . . . . . . . . . . . . . . . . . . . A . . . . . . . . . . . . . . . . . . . . . . . .  
MT258188.1 *Bactrocera zonata* . . . . . . . . . . . . . . . . . . . . . . . . . . . . . . . . . A . . . . . . . . . . . . . . . . . . . . . . . .  
KJ142766.1 *Zeugodacus cucurbit* . . . C . . . . . . . . . . . . . . . . . . . . . . . . . . . . . . . . . A . . . . . A . . . . . A . . . . . . . . . . . C . T . . . . . TT . . . .  
MN016983.1 *Zeugodacus cucurbit* T - - - . C . . . . . GAG . . G . A . TA . T . A . AGC . CT . C . TT - . . . . . - C . TC . A . CT . . . . CC  
KP851001.1 *Zeugodacus cucurbit* T - - - . C . . . . . GAG . . G . A . CA . T . A . AGC . CT . C . TT - . . . . . - C . TC . A . CT . . . . CC

OL701253.1 *Zeugodacus cucurbit* T - - - . C . . . . G A G . . G . A . T A . T . A . A G C . C T . C . T T - . . - - - - - C . T C . A . C T . . . . C C  
OK103985.1 *Zeugodacus cucurbit* T - - - . C . . . . G A G . . G . A . T A . T . A . A G C . C T . C . T T - . . - - - - - C . T C . A . C T . . . . C C  
MW300735.1 *Zeugodacus cucurbit* T - - - . C . . . . G A G . . G . A . T A . T . A . A G C . C T . C . T T - . . - - - - - C . T C . A . C T . . . . C C  
KT175576.1 *Zeugodacus tau* T - - - . C . . . . G A G . . G . A . T A . T A A . A G C . C T . C . T T - . . - - - - - C . T C . A . C T . . . . C C C  
OL701270.1 *Zeugodacus tau* T - - - . C . . . . G A G . . G . A . T A . T A A . A G C . C T . C . T T - . . - - - - - C . T C . A . C T . . . . C C C  
MT257465.1 *Zeugodacus tau* . . . . . A . . . . . A . . . . . T . . . . . C . T . . . . . T T . . . . .  
MK249718.1 *Zeugodacus tau* T - - - . T . . . . G A G . . G . . . . T A . T A A . . G C A . T A . . . . T - . . - - - - - C . T C . T . C . . . . T C C  
KJ753948.1 *Bactrocera tau* T - - - . C . . . . G A G . . G . A . T A . T A A . A G C . C T . C . T T - . . - - - - - C . T C . A . C T . . . . C C C  
MT456363.1 *Bactrocera digressa* . . . . . A . . . . . A . . . . . C . . . . .  
MG683319.1 *Bactrocera digressa* . T G . C C . . . . . G G A G C A . . T G G A . A A C G C . G G . G . G . A . T C . G G . G A . G C . A C . T T A G . A  
GQ458048.1 *Bactrocera caudata* . - - - - . G G . G G C T A . . C A A C . A A A A A T . . . . A A . A C . . . . G T T G G . A C A G C A A . A A T . . . .  
FJ903493.1 *Bactrocera caudata* . C . . . . . A . . . . . A . . . . . C . . . . . A . . . . .  
JX559676.1 *Bactrocera caudata* T - - - . T . . . . G A G . A G . A . T G C T A A . A G C C . T A . . . . T - . . - - - - - C . . . . C . T . C A T . . . . C C  
KF659996.1 *Bactrocera caudata* T - - - . T . . . . G A G . A G . A . T A . T A A . A G C C C T A . . . . T - - - - - C . . . . C . T . C A T . . . . C C  
MK125511.1 *Zeugodacus caudatus* T - - - . T . . . . G A G . A G . A . T G C T A A . A G C C . T A . . . . T - . . - - - - - C . . . . C . T . C A T . . . . C C  
AF423109.1 *Bactrocera caudata* . . C . . . . . A . . . . . A . . . . . C . . . . . A . . . . .  
MK053684.1 *Bactrocera nigrofem* . - - - - . A . G . G G C T A G . C A A C . A A A A A T . . . . A A . A C . . . . G T A G G . A C G G C A A . A A T . . . .  
MK660603.1 *Bactrocera nigrofem* T - - - . C . . . . G A G . A G . . . . T A . T A A . A G C C . T A . . . . G . . . . T - - - - - C . G C . A . C . T . . . . C C  
MH172171.1 *Bactrocera nigrofem* . . . . . . . . . . A . . . . . C . . . . . G . . . . .  
KT594975.1 *Bactrocera scutella* . . . . . C . . . . . A . . . . . A . . . . . C . . . . . T . . . . . C C . . . . . T . . . . .  
MK053674.1 *Zeugodacus scutella* . - - - - . G G . A G C T A . . C A A C . A A A A A T . . . . A A . A C . . . . G T T G G . A C A G C A A . A A T . . . .  
KM024429.1 *Bactrocera scutella* T - - - . C . . . . G A G . A G . A . T A . T A A . A G C A . T A . . . . . - - - - - C . T C . . . . C A T . . . . C C  
KT588387.1 *Zeugodacus scutella* T - - - . C . . . . G A . . . . A A . T A A . A G C A . T A . . . . . - - - - - C . T C . . . . C A T . . . . C C  
KF660074.1 *Bactrocera scutella* T - - - . C . . . . G A G . A G . A . T A . T A A . A G C A . T A . . . . . - - - - - C . T C . . . . C A T . . . . C C  
KJ753902.1 *Bactrocera cilifera* T - - - . T . . . . G A G . C G . . . . T A C T A A . . G C C C T C C . T T - . . - - - - . . . . . C . T . C A T . . . . C C  
MH395849.1 *Zeugodacus cilifer* T - - - . T . . . . G A G . C G . . . . T A . T A A . . G C C C T C C . T T - . . - - - - . . . . . C . T . C A T . . . . C C  
JX266417.1 *Bactrocera cilifera* T - - - . T . . . . G A G . C G . . . . T A . T A A . . G C C C T C C . T T - . . - - - - . . . . . C . T . C A T . . . . C C  
KF660011.1 *Bactrocera cilifera* T - - - . T . . . . G A G . C G . . . . T A . T A A . . G C C C T C C . T T - . . - - - - . . . . . C . T . C A T . . . . C C  
MF095190.1 *Zeugodacus cilifer* T - - - . T . . . . G A G . C G . . . . T A . T A A . . G C C C T C C . T T - . . - - - - . . . . . C . T . C A T . . . . C C

730 740 750 760 770 780

KM359573.1 *Bactrocera dorsalis* C A T C A T T T G A G A A A G T T T A G T A A C A C A A C G A C A A G T A - - A T T T A C C C T A T A C A G C T T A G T  
HQ446518.1 *Bactrocera dorsalis* . . . . . A . . . . .  
OQ626326.1 *Bactrocera dorsalis* . . . . . A . . . . .  
OP036560.1 *Bactrocera dorsalis* . . . . . A . . . . .  
OK175615.1 *Bactrocera dorsalis* . . . . .  
MW032650.1 *Bactrocera dorsalis* . . . . .  
MT257267.1 *Bactrocera correcta* . . . . . T . . . . . G . . . . . C . . . . . T . . . . . A . . . . .  
MK053681.1 *Bactrocera correcta* G T A G C . G A A G T G . . A . A A G C . C G A G T G T . T . . . . . T C . . . . . T . C C T A . A G T G . A T A T A . G A .  
KJ753908.1 *Bactrocera correcta* A G . - - . . . A G C . G G A G C . . T C . C T . T . C T A T T . . C A G - - . . . C G . A A . . T A . A T A . . . . C C .  
MN016970.1 *Bactrocera correcta* A G . - - . . . A G C . G G A G C . . T C . C T . T . C T A T T . . C A G - - . . . C G . A A . . T A . A T A . . . . C C .  
AY530905.1 *Bactrocera correcta* . . . . . T . . . . . G . . . . . C . . . . . T . . . . . A . . . . .  
JQ692631.1 *Bactrocera correcta* A G . - - . . . A G C . G G A G C . . T C . C T . T . C T A T T . . C A G - - . . . C G . A A . . T A . A T A . . . . C C .  
MT257819.1 *Bactrocera zonata* . . . . . C . . . . . C . . . . . A . . . . .  
MG881756.1 *Bactrocera zonata* A G . - - . . . A G C G G G A G C . . T . . . C T . T . T T A T T . . C A G - - . . . C G . A A T . T A . A T A . . . . C A .  
JX965418.1 *Bactrocera zonata* A G . - - . . . A G C . G G A G C . . T . . . C T . T . C T A T T . . C A G - - . . . C C G . A A T C T A . A T A . . . . C C .  
MT257315.1 *Bactrocera zonata* . . . . . C . . . . . C . . . . . A . . . . .  
MT258188.1 *Bactrocera zonata* . . . . . C . . . . . C . . . . . A . . . . .  
KJ142766.1 *Zeugodacus cucurbit* T . . . . . T . . . . . T . . . . . A . . . . . A . . . . .  
MN016983.1 *Zeugodacus cucurbit* T G . - - G . . . . A G C C G G A G C . . T . . . C T . T . C T T T T . . C A G - - . . . C C G . A A T . T A . A C A . C . C T .  
KP851001.1 *Zeugodacus cucurbit* T G . - - A . . . . A G C C G G A G C . . T . . . C T . T . C T T T T . . C A G - - . . . C C G . A A T . T A . A C A . C . C T .  
OL701253.1 *Zeugodacus cucurbit* T G . - - A . . . . A G C C G G A G C . . T . . . C T . T . C T T T T . . C A G - - . . . C C G . A A T . T A . A C A . C . C T .  
OK103985.1 *Zeugodacus cucurbit* T G . - - A . . . . A G C C G G A G C . . T . . . C T . T . C T T T T . . C A G - - . . . C C G . A A T . T A . A C A . C . C T .



OL701270.1 *Zeugodacus tau* . . . . . G . CCC . GCTGG . GGTGGGG . T . . . . . TATTTTA . ACCA . . . . . C . . . . . TT . . . . . TTTTTG  
MT257465.1 *Zeugodacus tau* . . . . . G . CCC . GCTGG . GGTGGGG . T . . . . . TATTTTA . ACCA . . . . . C . . . . . TT . . . . . TTTTTG  
MK249718.1 *Zeugodacus tau* . . . . . G . CCCC GCTGGAGG . GG . G . . . . . TATTCTT . ACCA . . . . . T . . . . . TT . . . . . TTTTTG  
KJ753948.1 *Bactrocera tau* . . . . . G . CCC . GCTGG . GGTGGGG . T . . . . . TATTTTA . ACCA . . . . . C . . . . . TT . . . . . TTTTTG  
MT456363.1 *Bactrocera digressa* . . . . . G . CCC . GCTGG . GGTGGGG . T . . . . . TATTTTA . ACCA . . . . . C . . . . . TT . . . . . TTTTTG  
MG683319.1 *Bactrocera digressa* . . . . . G . CCC . GCTGG . GGTGGGG . T . . . . . TATTTTA . ACCA . . . . . C . . . . . TT . . . . . TTTTTG  
GQ458048.1 *Bactrocera caudata* . . . . . G . CCC . GCTGG . GGTGGGG . T . . . . . TATTTTA . ACCA . . . . . C . . . . . TT . . . . . TTTTTG  
FJ903493.1 *Bactrocera caudata* . . . . . G . CCC . GCTGG . GGTGGGG . T . . . . . TATTTTA . ACCA . . . . . C . . . . . TT . . . . . TTTTTG  
JX559676.1 *Bactrocera caudata* . . . . . G . CCCC GCTGGAGG . GG . G . . . . . TATTCTT . ACCA . . . . . T . . . . . TT . . . . . TTTTTG  
KF659996.1 *Bactrocera caudata* . . . . . G . CCCC GCTGGAGG . GG . G . . . . . TATTCTT . ACCA . . . . . T . . . . . TT . . . . . TTTTTG  
MK125511.1 *Zeugodacus caudatus* . . . . . G . CCC . GCAGGGGG . TGGGG . . . . . TATTTTA . ACCA . . . . . T . . . . . TT . . . . . TTTTTG  
AF423109.1 *Bactrocera caudata* . . . . . G . CCC . GCAGGGGG . TGGGG . . . . . TATTTTA . ACCA . . . . . T . . . . . TT . . . . . TTTTTG  
MK053684.1 *Bactrocera nigrofem* GTGCTC . . . AC . . . A . A . C . T . G . AGA . . . AATTGCTATT . T . GC . . . AGA . T . TTC . . . . . GAG  
MK660603.1 *Bactrocera nigrofem* . T . . TG . . CCCTGCTGG . GG . GG . G . . . . . TATTCTT . ACCA . . . . . C . . . . . TT . . . . . TTTTTG  
MH172171.1 *Bactrocera nigrofem* . . A . . . . . . . . . . . . . . . . A . . . . . . . . . . . . . . . . A . . . . . . . . . . . . . . . . C . . . . . . . . . . . T . . . .  
KT594975.1 *Bactrocera scutella* . . . . . G . CCC . GCTGG . GGTGGGG . T . . . . . TATTTTA . ACCA . . . . . C . . . . . TT . . . . . TTTTTG  
MK053674.1 *Zeugodacus scutella* . . . . . G . CCC . GCTGG . GGTGGGG . T . . . . . TATTTTA . ACCA . . . . . C . . . . . TT . . . . . TTTTTG  
KM024429.1 *Bactrocera scutella* . . . . . G . CCC . GCTGG . GGTGGGG . T . . . . . TATTTTA . ACCA . . . . . C . . . . . TT . . . . . TTTTTG  
KT588387.1 *Zeugodacus scutella* . . . . . G . CCC . GCTGG . GGTGGGG . T . . . . . TATTTTA . ACCA . . . . . C . . . . . TT . . . . . TTTTTG  
KF660074.1 *Bactrocera scutella* . . . . . G . CCC . GCTGG . GGTGGGG . T . . . . . TATTTTA . ACCA . . . . . C . . . . . TT . . . . . TTTTTG  
KJ753902.1 *Bactrocera cilifera* . . . . . G . CCC . GCTGG . GGTGGGG . T . . . . . TATTTTA . ACCA . . . . . C . . . . . TT . . . . . TTTTTG  
MH395849.1 *Zeugodacus cilifer* . . . . . G . CCC . GCTGG . GGTGGGG . T . . . . . TATTTTA . ACCA . . . . . C . . . . . TT . . . . . TTTTTG  
JX266417.1 *Bactrocera cilifera* . . . . . G . CCC . GCTGG . GGTGGGG . T . . . . . TATTTTA . ACCA . . . . . C . . . . . TT . . . . . TTTTTG  
KF660011.1 *Bactrocera cilifera* . . . . . G . CCC . GCTGG . GGTGGGG . T . . . . . TATTTTA . ACCA . . . . . C . . . . . TT . . . . . TTTTTG  
MF095190.1 *Zeugodacus cilifer* . . . . . G . CCC . GCTGG . GGTGGGG . T . . . . . TATTTTA . ACCA . . . . . C . . . . . TT . . . . . TTTTTG

850                      860                      870                      880                      890                      900

                  |                             |                             |                             |                             |                             |                             |                             |

KM359573.1 *Bactrocera dorsalis* C T T T T A A C T A A T T A T C T A A T A T G G C A G  
HQ446518.1 *Bactrocera dorsalis* . . . . . G . CCC . GCTGG . GGTGGGG . T . . . . . TATTTTA . ACCA . . . . . C . . . . . TT . . . . . TTTTTG  
OQ626326.1 *Bactrocera dorsalis* . . . . . G . CCC . GCTGG . GGTGGGG . T . . . . . TATTTTA . ACCA . . . . . C . . . . . TT . . . . . TTTTTG  
OP036560.1 *Bactrocera dorsalis* . . . . . G . CCC . GCTGG . GGTGGGG . T . . . . . TATTTTA . ACCA . . . . . C . . . . . TT . . . . . TTTTTG  
OK175615.1 *Bactrocera dorsalis* . . . . . G . CCC . GCTGG . GGTGGGG . T . . . . . TATTTTA . ACCA . . . . . C . . . . . TT . . . . . TTTTTG  
MW032650.1 *Bactrocera dorsalis* . . . . . G . CCC . GCTGG . GGTGGGG . T . . . . . TATTTTA . ACCA . . . . . C . . . . . TT . . . . . TTTTTG  
MT257267.1 *Bactrocera correcta* . . . . . G . CCC . GCTGG . GGTGGGG . T . . . . . TATTTTA . ACCA . . . . . C . . . . . TT . . . . . TTTTTG  
MK053681.1 *Bactrocera correcta* A . . C C G . . . T G T T . . C C . . T C T T . . C C T . . A T T C T T G A C T A A T A A T A T G A G A A A T T A T T C C G A A T C  
KJ753908.1 *Bactrocera correcta* G . C . . . . . G . CCC . GCTGG . GGTGGGG . T . . . . . TATTTTA . ACCA . . . . . C . . . . . TT . . . . . TTTTTG  
MN016970.1 *Bactrocera correcta* G . . . . . G . CCC . GCTGG . GGTGGGG . T . . . . . TATTTTA . ACCA . . . . . C . . . . . TT . . . . . TTTTTG  
AY530905.1 *Bactrocera correcta* . . . . . G . CCC . GCTGG . GGTGGGG . T . . . . . TATTTTA . ACCA . . . . . C . . . . . TT . . . . . TTTTTG  
JQ692631.1 *Bactrocera correcta* . . . . . G . CCC . GCTGG . GGTGGGG . T . . . . . TATTTTA . ACCA . . . . . C . . . . . TT . . . . . TTTTTG  
AT . . . . . A T . . . . .  
MT257819.1 *Bactrocera zonata* . . . . . G . C A C . . . . . G . CCC . GCTGG . GGTGGGG . T . . . . . TATTTTA . ACCA . . . . . C . . . . . TT . . . . . TTTTTG  
MG881756.1 *Bactrocera zonata* . . . . . G . C A C . . . . . G . CCC . GCTGG . GGTGGGG . T . . . . . TATTTTA . ACCA . . . . . C . . . . . TT . . . . . TTTTTG  
JX965418.1 *Bactrocera zonata* . . . . . G . C A C . . . . . G . CCC . GCTGG . GGTGGGG . T . . . . . TATTTTA . ACCA . . . . . C . . . . . TT . . . . . TTTTTG  
MT257315.1 *Bactrocera zonata* . . . . . G . C A C . . . . . G . CCC . GCTGG . GGTGGGG . T . . . . . TATTTTA . ACCA . . . . . C . . . . . TT . . . . . TTTTTG  
MT258188.1 *Bactrocera zonata* . . . . . G . C A C . . . . . G . CCC . GCTGG . GGTGGGG . T . . . . . TATTTTA . ACCA . . . . . C . . . . . TT . . . . . TTTTTG  
C . . . . . C . . . . .  
KJ142766.1 *Zeugodacus cucurbit* . . . . . G . C A C C C T G . . . . . T C T A . T A T G . C A G  
MN016983.1 *Zeugodacus cucurbit* G . . C A C C C T G . . . . . G . CCC . GCTGG . GGTGGGG . T . . . . . TATTTTA . ACCA . . . . . C . . . . . TT . . . . . TTTTTG  
KP851001.1 *Zeugodacus cucurbit* . . . . . G . C A C C C T . . . . .  
OL701253.1 *Zeugodacus cucurbit* . . . . . G . C A C C C T . . . . .  
OK103985.1 *Zeugodacus cucurbit* . . . . . G . C A C C C T . . . . .  
MW300735.1 *Zeugodacus cucurbit* . . . . . G . C A C C C T . . . . .  
KT175576.1 *Zeugodacus tau* . . . . . G . C A C C C T G . . . . . G . T .  
OL701270.1 *Zeugodacus tau* . . . . . G . C A C C C T G . . . . . G . T .  
MT257465.1 *Zeugodacus tau* . . . . . G . C A C C C T G . . . . . G . T .

MK249718.1 *Zeugodacus tau* G . C A C C C T G . . G - - - - -  
 KJ753948.1 *Bactrocera tau* G . C - - - - -  
 MT456363.1 *Bactrocera digressa* . . . . . C . - - - -  
 MG683319.1 *Bactrocera digressa* - - - - -  
 GQ458048.1 *Bactrocera caudata* - - - - -  
 FJ903493.1 *Bactrocera caudata* . . . . . C . T C T A . T A T G . C A G A T T A G T G C A T T - - - - -  
 JX559676.1 *Bactrocera caudata* - - - - -  
 KF659996.1 *Bactrocera caudata* - - - - -  
 MK125511.1 *Zeugodacus caudatus* - - - - -  
 AF423109.1 *Bactrocera caudata* . . . . . C . T C - - - - -  
 MK053684.1 *Bactrocera nigrofem* A . C C A . . T G T T . C C . T C T T . C C T . A T T C T T G A C T A A T A A T A T G G G A A A T T A T T C C G A A T C  
 MK660603.1 *Bactrocera nigrofem* G . C A C C - - - - -  
 MH172171.1 *Bactrocera nigrofem* . . . . . C . . . . . A T T A G T G C A T T G G A C C C - - - - -  
 KT594975.1 *Bactrocera scutella* - - - - -  
 MK053674.1 *Zeugodacus scutella* A A C C G . . T G T T . C C . T . T T A C C A . A T T C T T G G C T A A T A A T A T G G G A G A T T A T T C C G A A T C  
 KM024429.1 *Bactrocera scutella* G . C - - - - -  
 KT588387.1 *Zeugodacus scutella* G . C A C C C - - - - -  
 KF660074.1 *Bactrocera scutella* - - - - -  
 KJ753902.1 *Bactrocera cilifera* G . C - - - - -  
 MH395849.1 *Zeugodacus cilifer* - - - - -  
 JX266417.1 *Bactrocera cilifera* - - - - -  
 KF660011.1 *Bactrocera cilifera* - - - - -  
 MF095190.1 *Zeugodacus cilifer* - - - - -

. . . . .  
 KM359573.1 *Bactrocera dorsalis* - - - - -  
 HQ446518.1 *Bactrocera dorsalis* - - - - -  
 OQ626326.1 *Bactrocera dorsalis* - - - - -  
 OP036560.1 *Bactrocera dorsalis* - - - - -  
 OK175615.1 *Bactrocera dorsalis* - - - - -  
 MW032650.1 *Bactrocera dorsalis* - - - - -  
 MT257267.1 *Bactrocera correcta* - - - - -  
 MK053681.1 *Bactrocera correcta* C T G G - - - - -  
 KJ753908.1 *Bactrocera correcta* - - - - -  
 MN016970.1 *Bactrocera correcta* - - - - -  
 AY530905.1 *Bactrocera correcta* - - - - -  
 JQ692631.1 *Bactrocera correcta* - - - - -  
 MT257819.1 *Bactrocera zonata* - - - - -  
 MG881756.1 *Bactrocera zonata* - - - - -  
 JX965418.1 *Bactrocera zonata* - - - - -  
 MT257315.1 *Bactrocera zonata* - - - - -  
 MT258188.1 *Bactrocera zonata* - - - - -  
 KJ142766.1 *Zeugodacus cucurbit* - - - - -  
 MN016983.1 *Zeugodacus cucurbit* - - - - -  
 KP851001.1 *Zeugodacus cucurbit* - - - - -  
 OL701253.1 *Zeugodacus cucurbit* - - - - -  
 OK103985.1 *Zeugodacus cucurbit* - - - - -  
 MW300735.1 *Zeugodacus cucurbit* - - - - -  
 KT175576.1 *Zeugodacus tau* - - - - -  
 OL701270.1 *Zeugodacus tau* - - - - -  
 MT257465.1 *Zeugodacus tau* - - - - -  
 MK249718.1 *Zeugodacus tau* - - - - -  
 KJ753948.1 *Bactrocera tau* - - - - -

|                                       |         |
|---------------------------------------|---------|
| MT456363.1 <i>Bactrocera digressa</i> | - - - - |
| MG683319.1 <i>Bactrocera digressa</i> | - - - - |
| GQ458048.1 <i>Bactrocera caudata</i>  | - - - - |
| FJ903493.1 <i>Bactrocera caudata</i>  | - - - - |
| JX559676.1 <i>Bactrocera caudata</i>  | - - - - |
| KF659996.1 <i>Bactrocera caudata</i>  | - - - - |
| MK125511.1 <i>Zeugodacus caudatus</i> | - - - - |
| AF423109.1 <i>Bactrocera caudata</i>  | - - - - |
| MK053684.1 <i>Bactrocera nigrofem</i> | C T G G |
| MK660603.1 <i>Bactrocera nigrofem</i> | - - - - |
| MH172171.1 <i>Bactrocera nigrofem</i> | - - - - |
| KT594975.1 <i>Bactrocera scutella</i> | - - - - |
| MK053674.1 <i>Zeugodacus scutella</i> | C T G G |
| KM024429.1 <i>Bactrocera scutella</i> | - - - - |
| KT588387.1 <i>Zeugodacus scutella</i> | - - - - |
| KF660074.1 <i>Bactrocera scutella</i> | - - - - |
| KJ753902.1 <i>Bactrocera cilifera</i> | - - - - |
| MH395849.1 <i>Zeugodacus cilifer</i>  | - - - - |
| JX266417.1 <i>Bactrocera cilifera</i> | - - - - |
| KF660011.1 <i>Bactrocera cilifera</i> | - - - - |
| MF095190.1 <i>Zeugodacus cilifer</i>  | - - - - |
